# Supplementary material for: Does a 6-point scale approach to post-treatment 18F-FDG PET-CT allow to improve response assessment in head and neck squamous cell carcinoma? A multicenter study
Source: PubMed Central journal article supplement (PMC8218061; doi:10.1186/s41824-020-00077-9), 2020-05-26

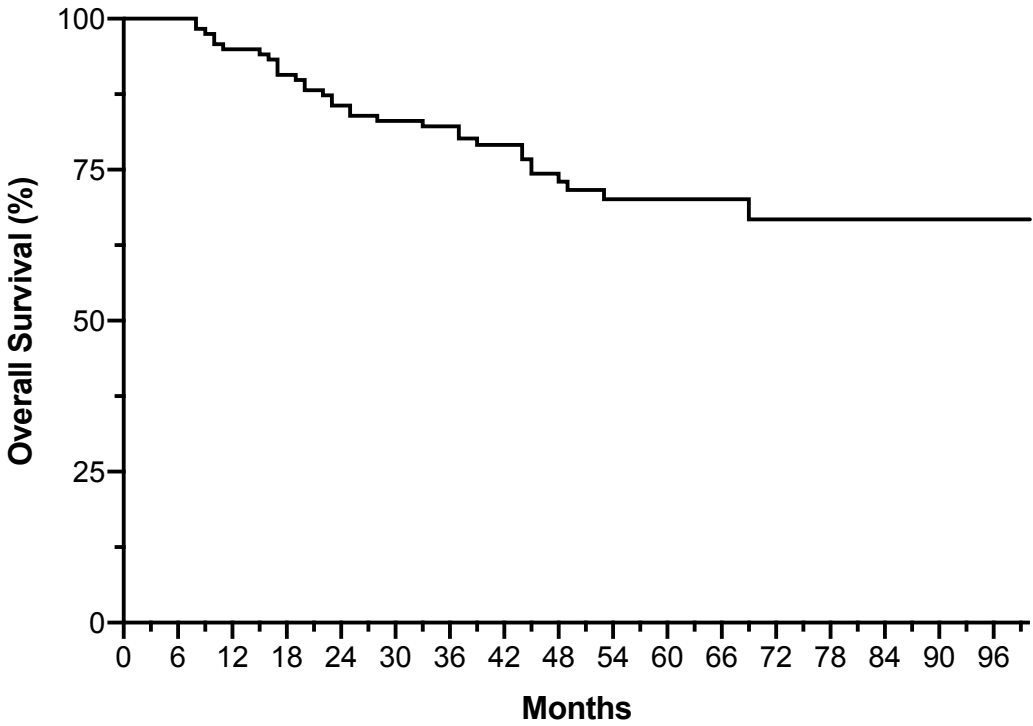

Supplement: 41824_2020_77_MOESM2_ESM.pdf [file 41824_2020_77_MOESM2_ESM.pdf]
