# Supplementary material for: Does a 6-point scale approach to post-treatment 18F-FDG PET-CT allow to improve response assessment in head and neck squamous cell carcinoma? A multicenter study
Source: PubMed Central journal article supplement (PMC8218061; doi:10.1186/s41824-020-00077-9), 2020-05-26

Baseline

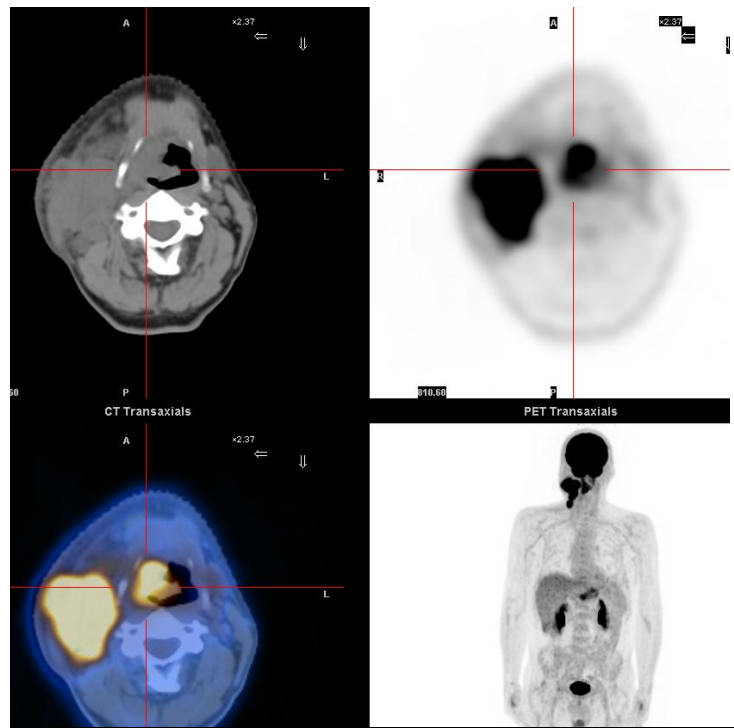

|                 |                 |                 |
|-----------------|-----------------|-----------------|
| Deauville       | Hopkins         | Cuneo           |
| 3<br>(negative) | 2<br>(negative) | 3<br>(negative) |

Post-treatment

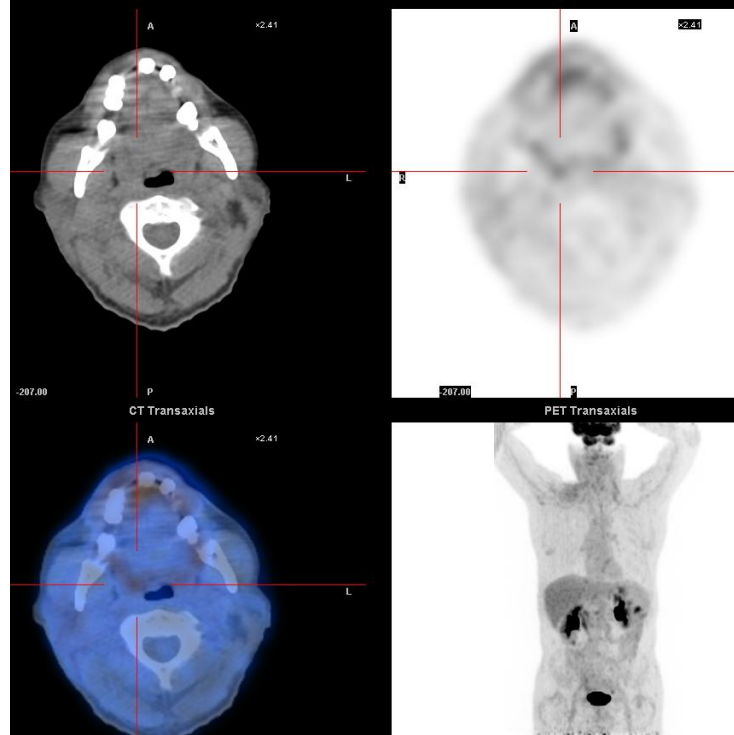

Post-treatment

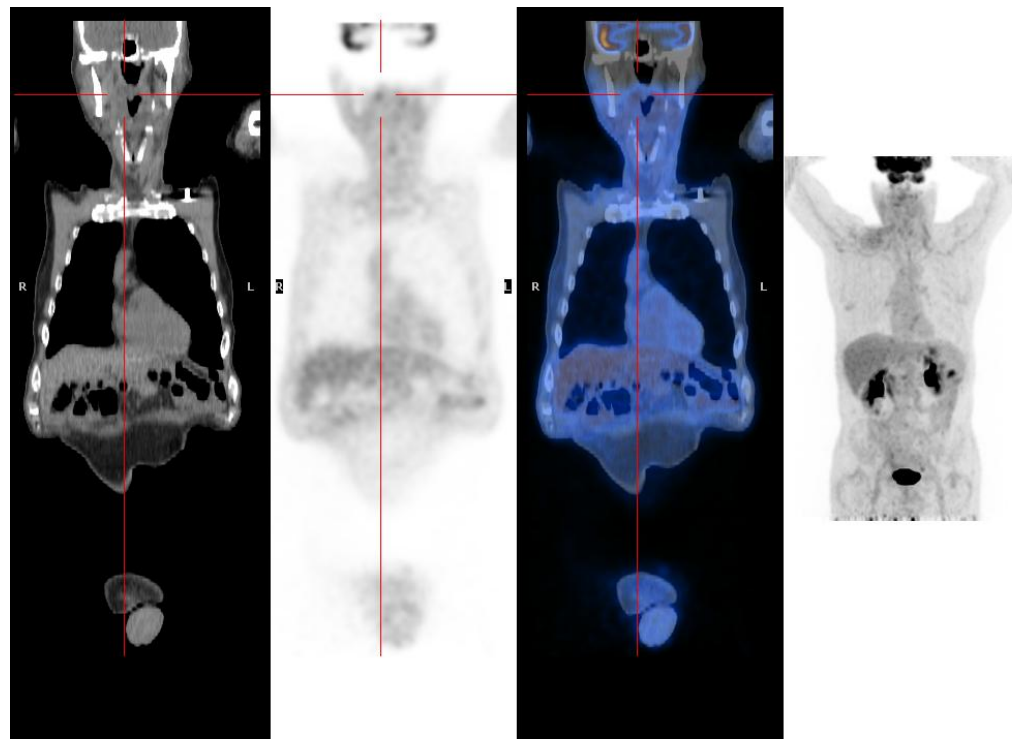

Supplement: 41824_2020_77_MOESM3_ESM.pdf [file 41824_2020_77_MOESM3_ESM.pdf]
